# Supplementary material for: In vivo detection of optically-evoked opioid peptide release
Source: eLife journal article supplement (doi:10.7554/elife.36520), 2018-09-03
Supplement: supp [file elife-36520-supp-v1.zip]

Archive with 6 entries (6 files):
- elife_poa_e36520_Figure_3_figure_supplement_1.pdf
- elife_poa_e36520_Figure_3_figure_supplement_3.pdf
- elife_poa_e36520_Transparent_Reporting_File.pdf
- elife_poa_e36520_Figure_2_figure_supplement_1.pdf
- elife_poa_e36520_Figure_3_figure_supplement_2.pdf
- elife_poa_e36520_Supplementary_File_1.docx
