# Supplementary figures and images for: In vivo detection of optically-evoked opioid peptide release
Source: eLife journal article supplement (doi:10.7554/elife.36520), 2018-09-03

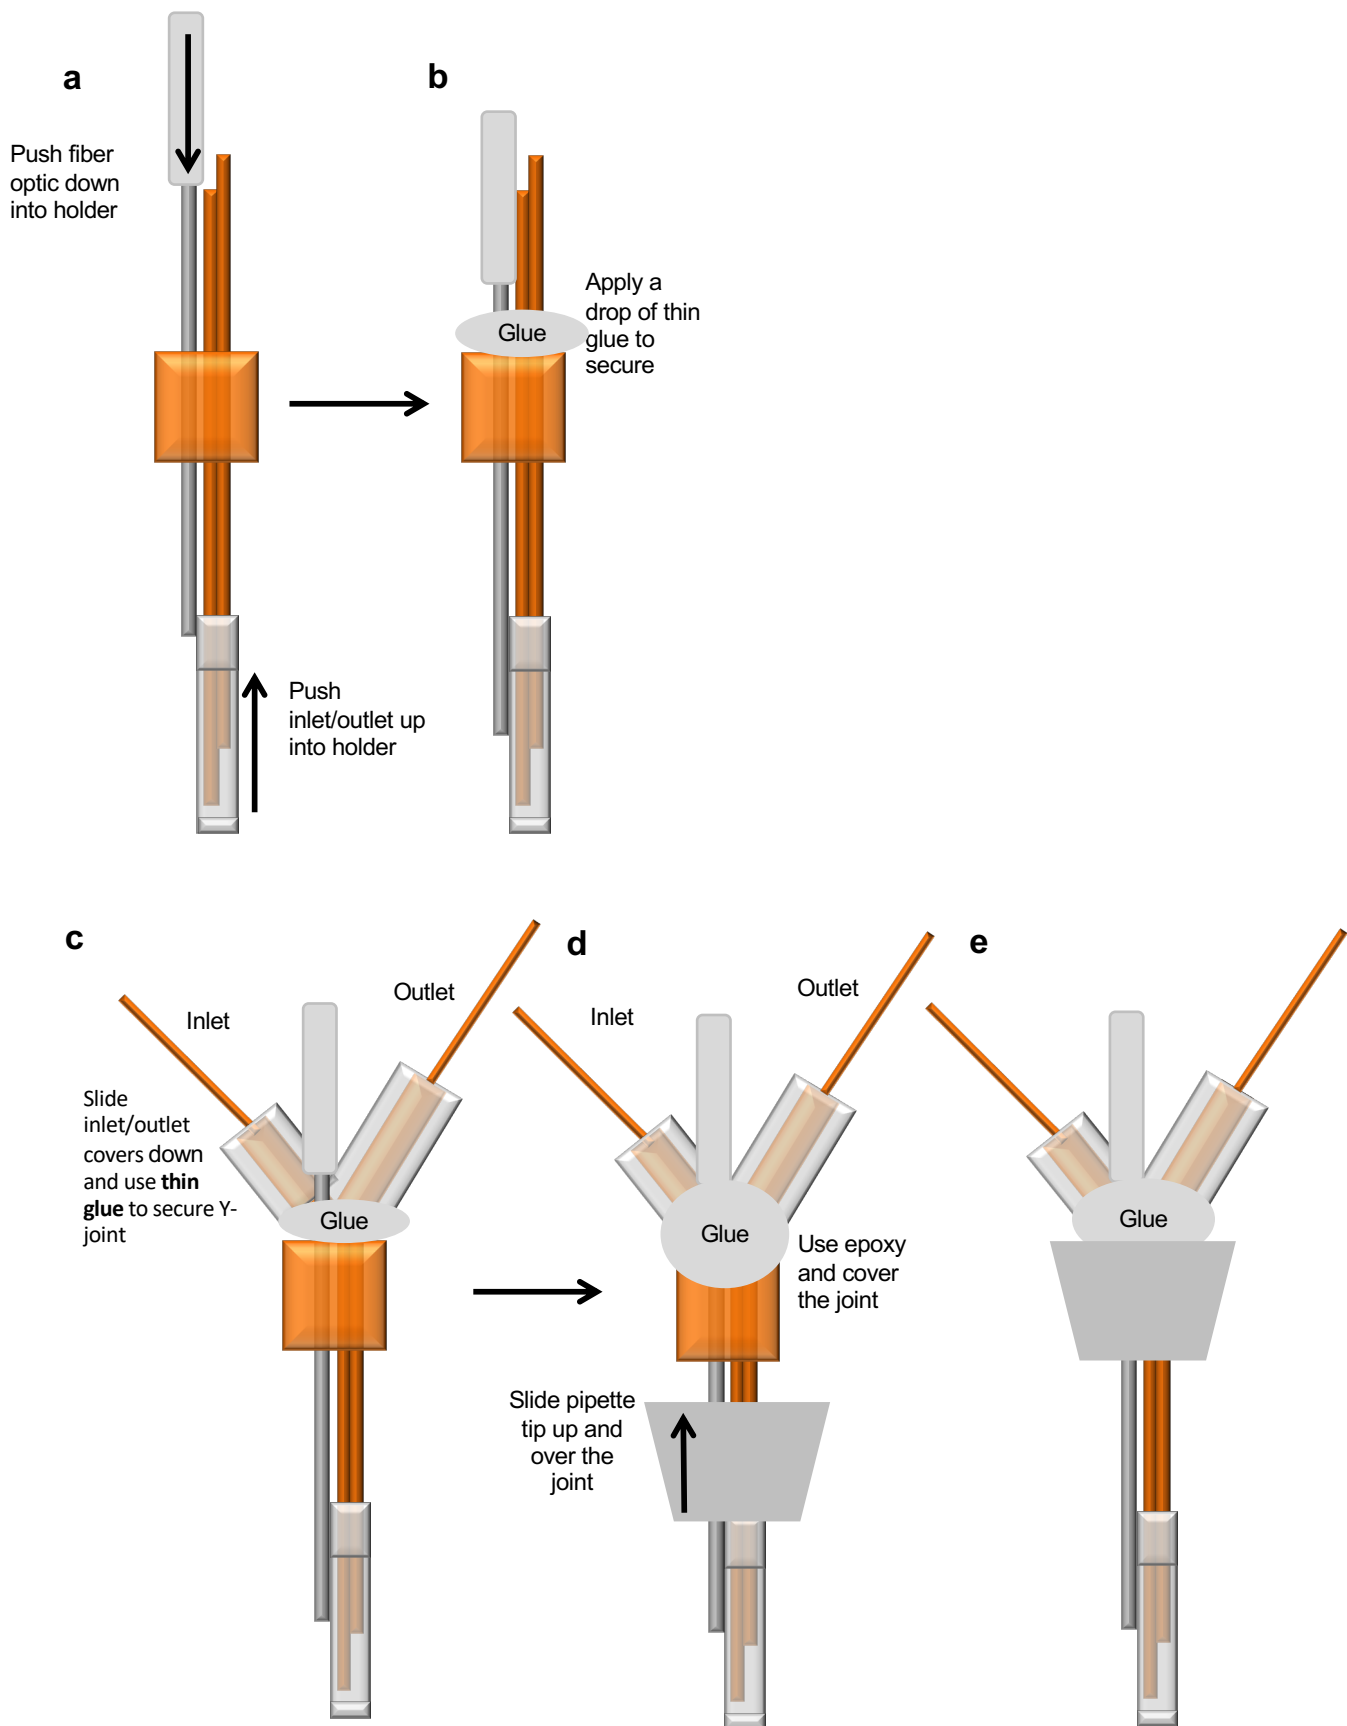

Figure 2- figure supplement 1

Supplement: supp [file elife-36520-supp-v1.zip]

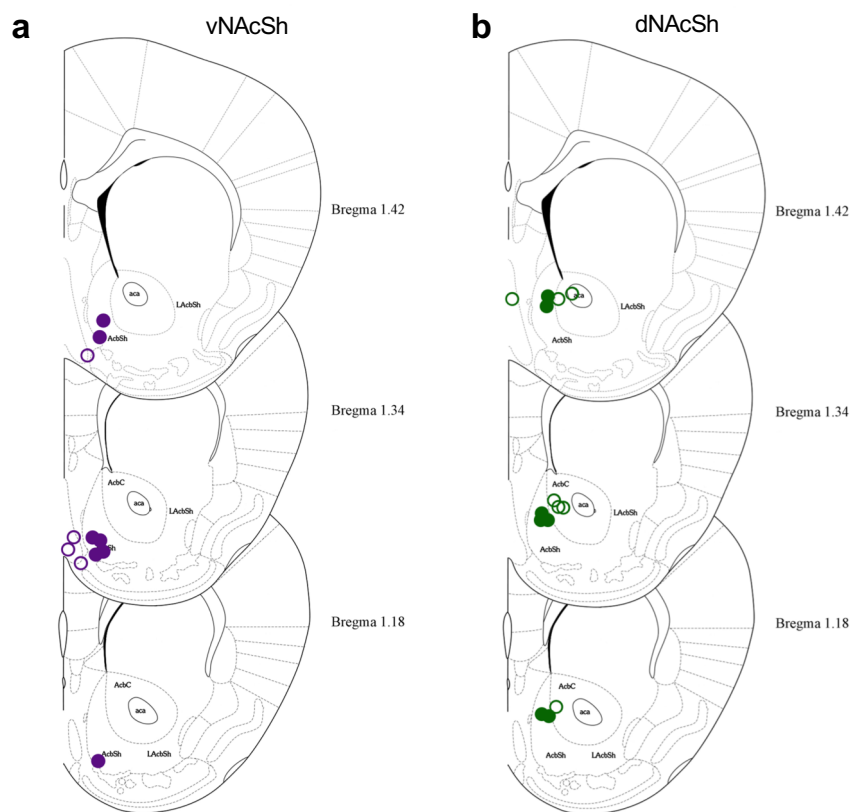

Figure 3- figure supplement 2

Supplement: supp [file elife-36520-supp-v1.zip]

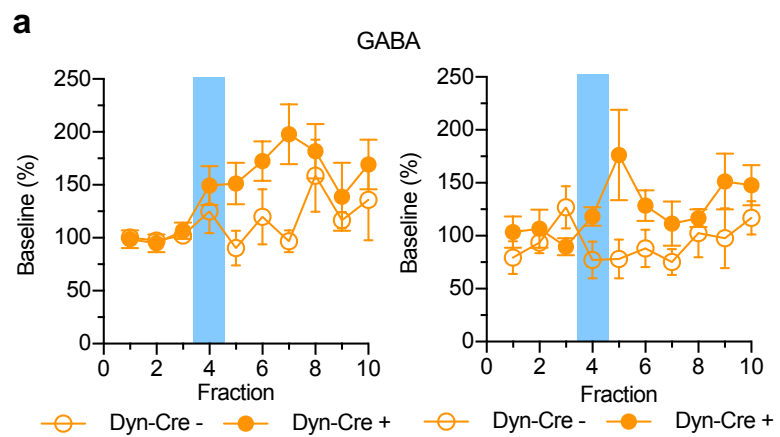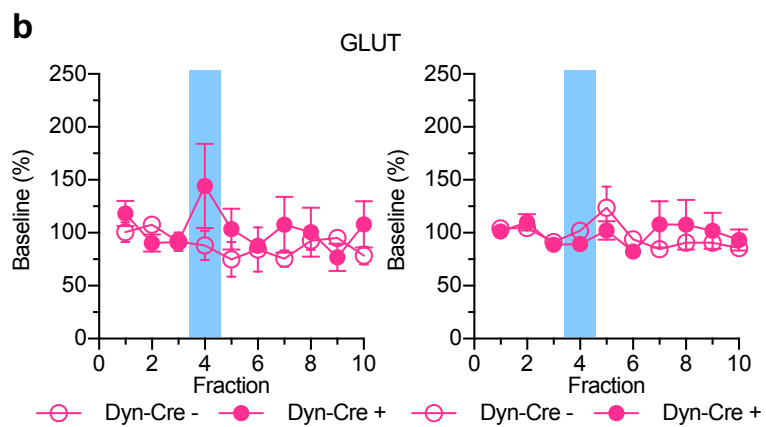

Figure 3- figure supplement 3

Supplement: supp [file elife-36520-supp-v1.zip]

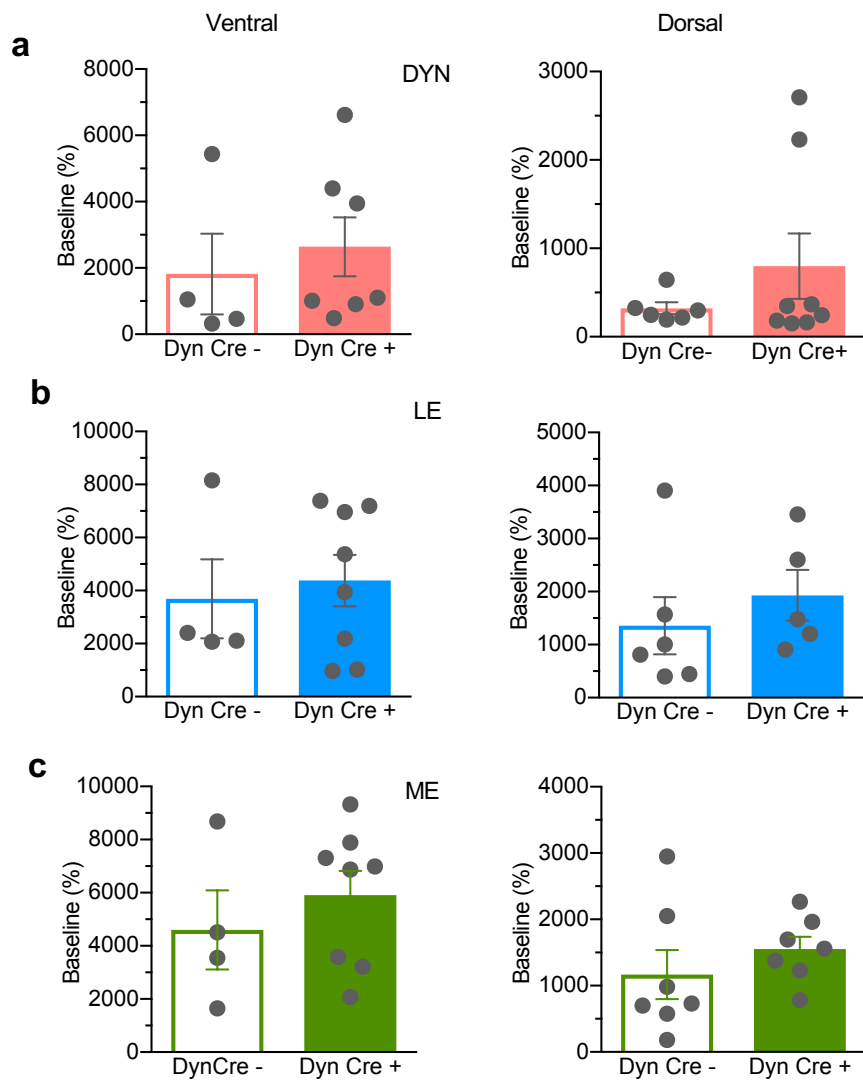

Figure 3- figure supplement 1

Supplement: supp [file elife-36520-supp-v1.zip › elife_poa_e36520_Figure_3_figure_supplement_1.pdf]
